# Supplementary material
Source: PubMed Central journal article supplement (PMC8126558)
Supplement: NIHMS1687480-supplement-Support.pdf [file NIHMS1687480-supplement-Support.pdf]

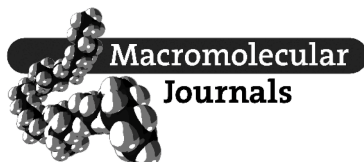

## Supporting Information

for *Macromol. Biosci.*, DOI: 10.1002/mabi.202000371

### Mannosylated Cationic Copolymers for Gene Delivery to Macrophages

Anton V. Lopukhov, Zigang Yang, Matthew J. Haney, Tatiana K. Bronich, Marina Sokolsky-Papkov, Elena V. Batrakova, Natalia L. Klyachko, and Alexander V. Kabanov\*

# Supporting Information

## Mannosylated Cationic Copolymers for Gene Delivery to Macrophages

*Anton V. Lopukhov, Zigang Yang, Matthew J. Haney, Tatiana K. Bronich, Marina Sokolsky-Papkov, Elena V. Batrakova, Natalia L. Klyachko, Alexander V. Kabanov\**

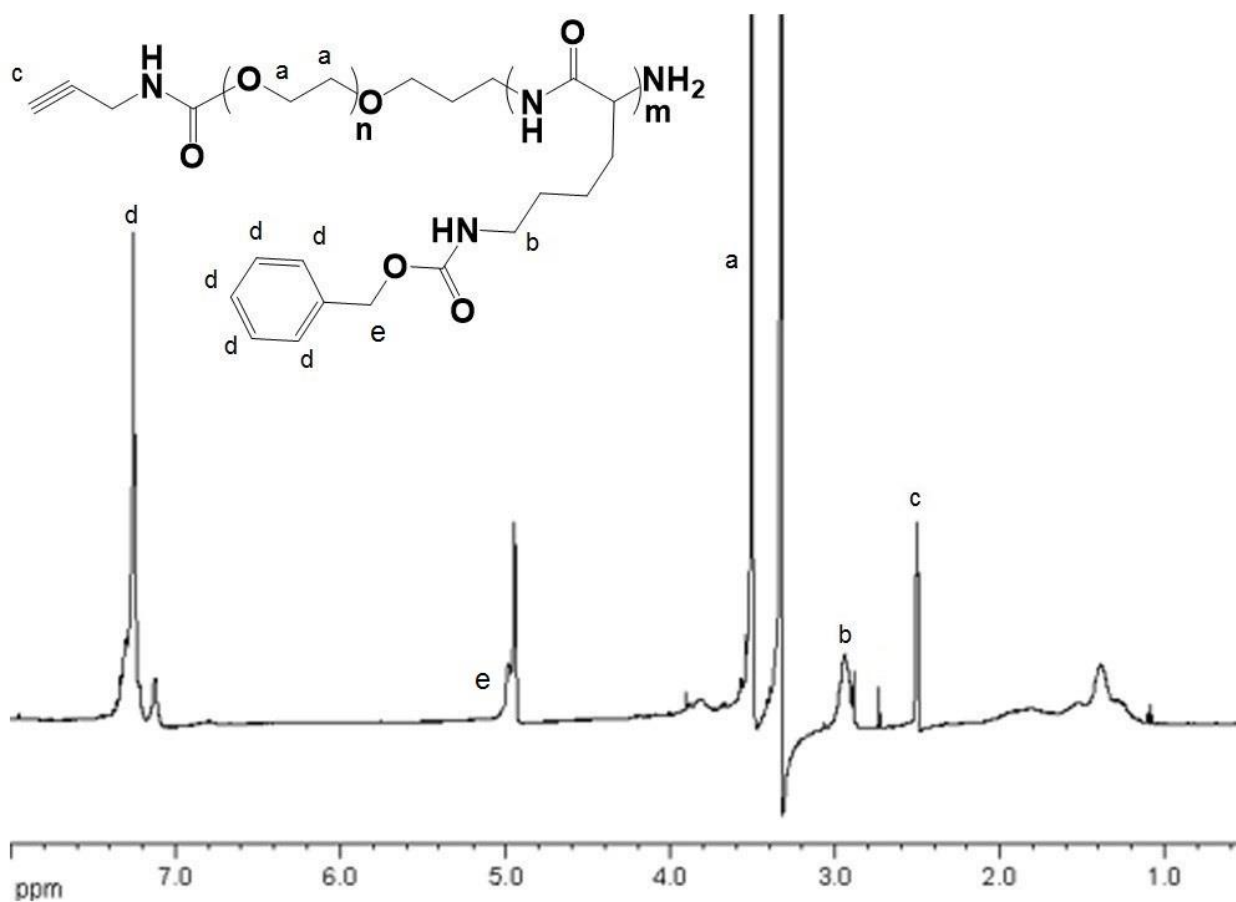

**Figure S1.** The <sup>1</sup>H-NMR spectra of propargyl-PEG<sub>114</sub>-*b*-PLL(Z)<sub>62</sub> (DMSO-d<sub>6</sub>, 400 MHz, 25 °C).

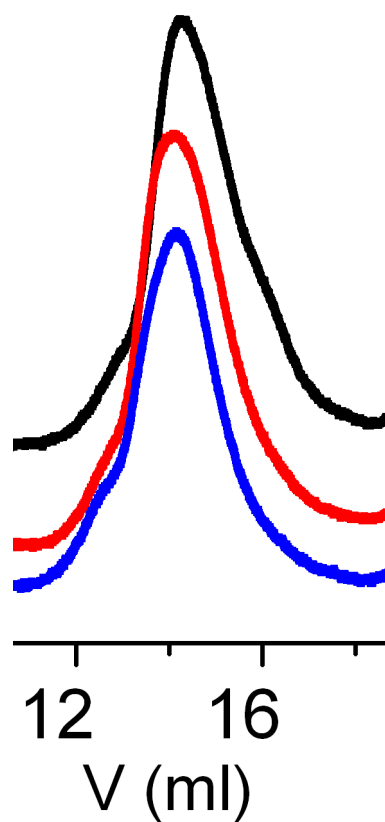

**Figure S2.** GPC chromatograms of propargyl-PEG<sub>114</sub>-*b*-PLL(Z)<sub>62</sub> (black), propargyl-PEG<sub>114</sub>-*b*-PLL(Z)<sub>150</sub> (red), propargyl-PEG<sub>114</sub>-*b*-PLL(Z)<sub>206</sub> (blue) in DMF containing 1% LiBr obtained at 45 °C at a flow rate of 1.0 mL/min using the refractive index detection.

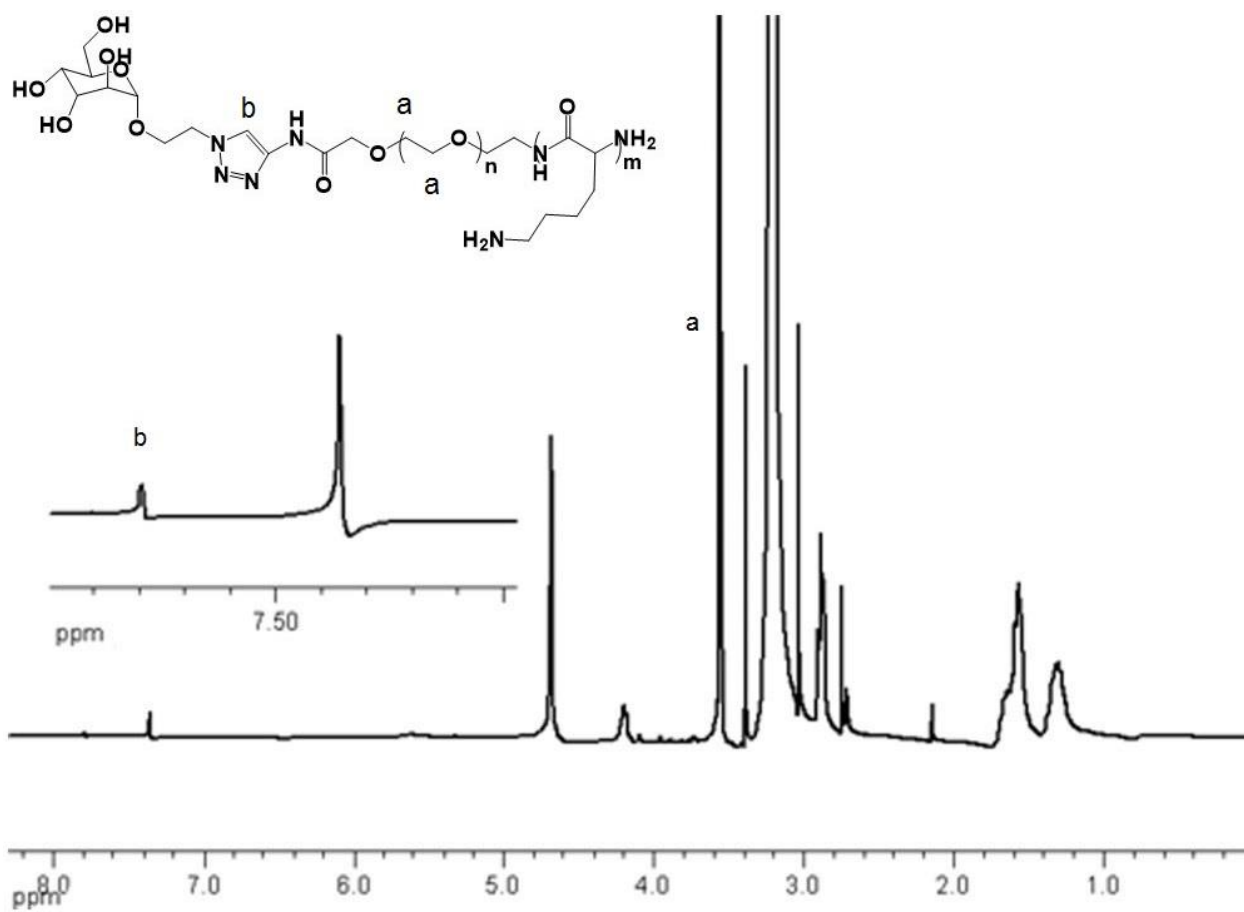

**Figure S3.** The <sup>1</sup>H-NMR spectra of Man-PEG<sub>114</sub>-b-PLL<sub>62</sub> (D<sub>2</sub>O, 400 MHz, 25 °C).

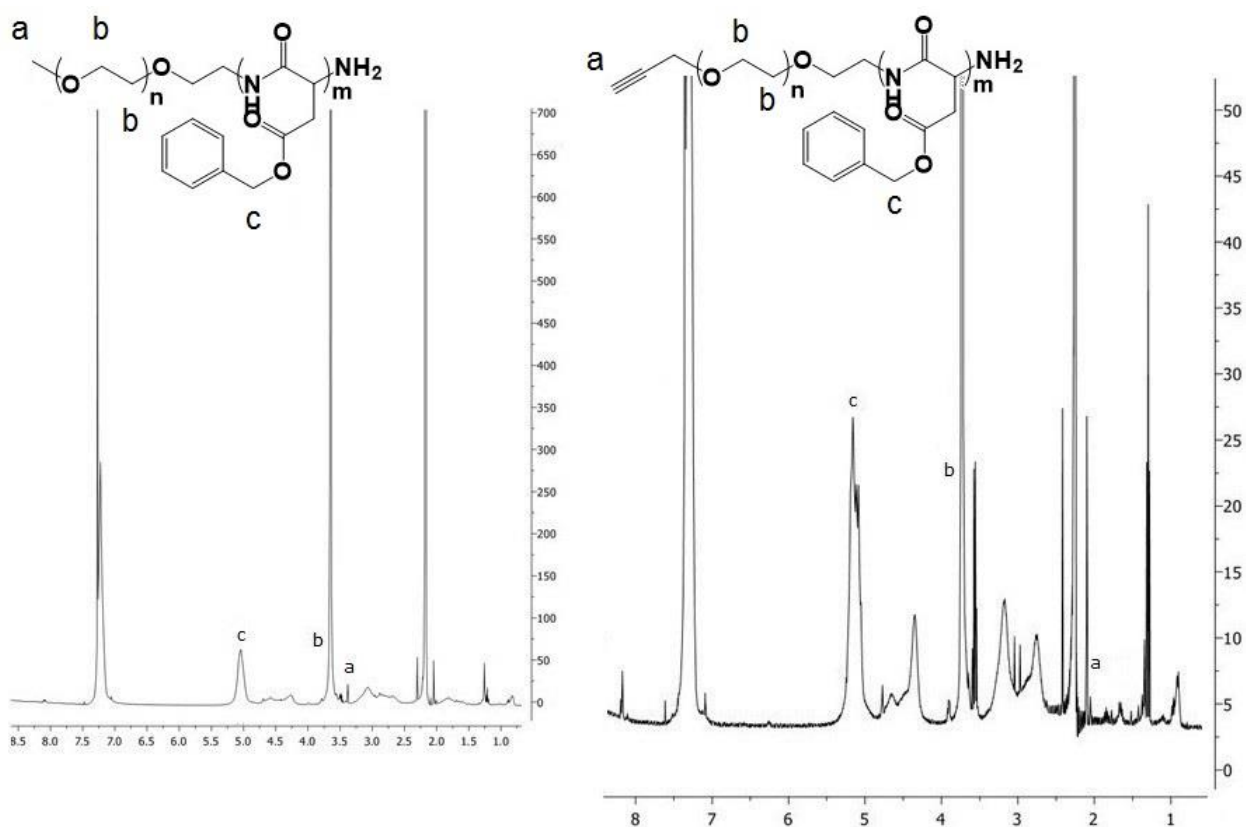

**Figure S4.**  $^1\text{H}$  NMR spectra of mPEG-*b*-PBLA (left) and alkyne-PEG-*b*-PBLA (right) ( $\text{CDCl}_3$ , 400 MHz, 25 °C).

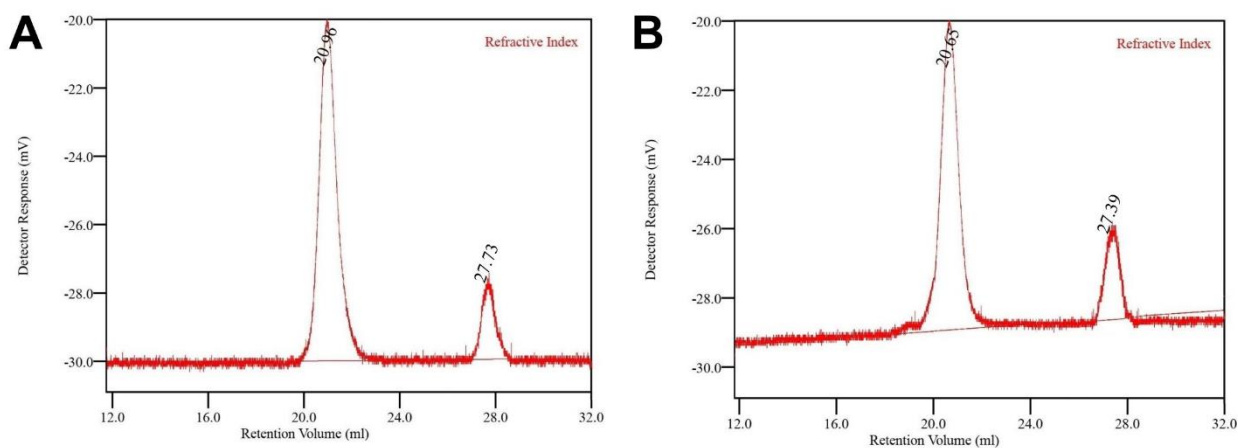

**Figure S5.** GPC chromatograms of (A) mPEG-*b*-pBLA and (B) alkyne-PEG-*b*-pBLA in DMF containing 1% LiBr obtained at 45 °C at a flow rate of 1.0 mL/min using the refractive index detection.

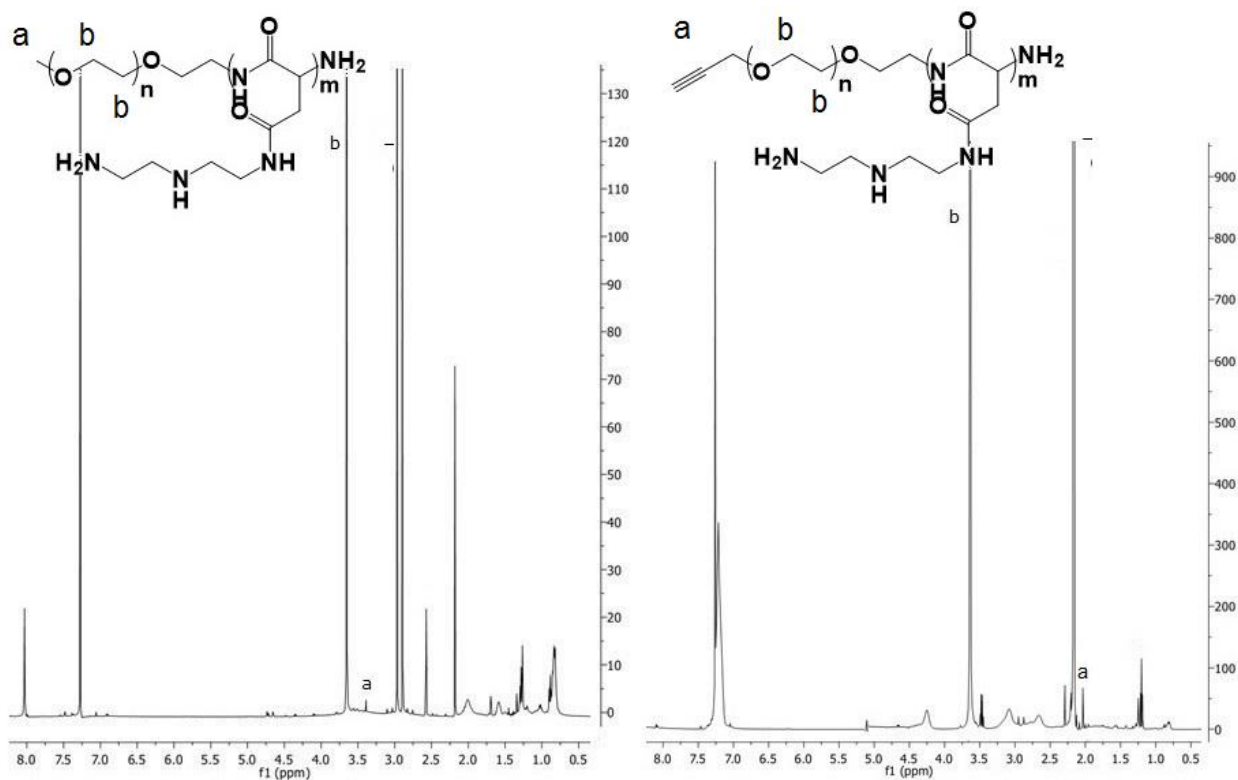

**Figure S6.**  $^1\text{H}$  NMR spectra of mPEG-*b*-pAsp(DET) (left) and alkyne-PEG-*b*-pAsp(DET) (right) ( $\text{CDCl}_3$ , 400 MHz, 25 °C).

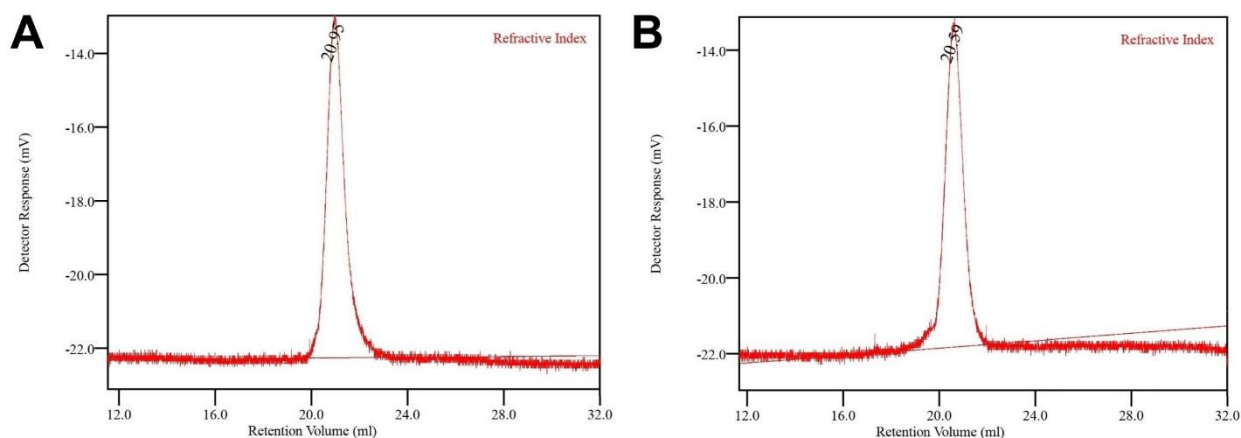

**Figure S7.** GPC chromatograms of (A) mPEG-*b*-pAsp(DET) and (B) alkyne-PEG-*b*-pAsp(DET) in DMF containing 1% LiBr obtained at 45 °C at a flow rate of 1.0 mL/min using the refractive index detection.

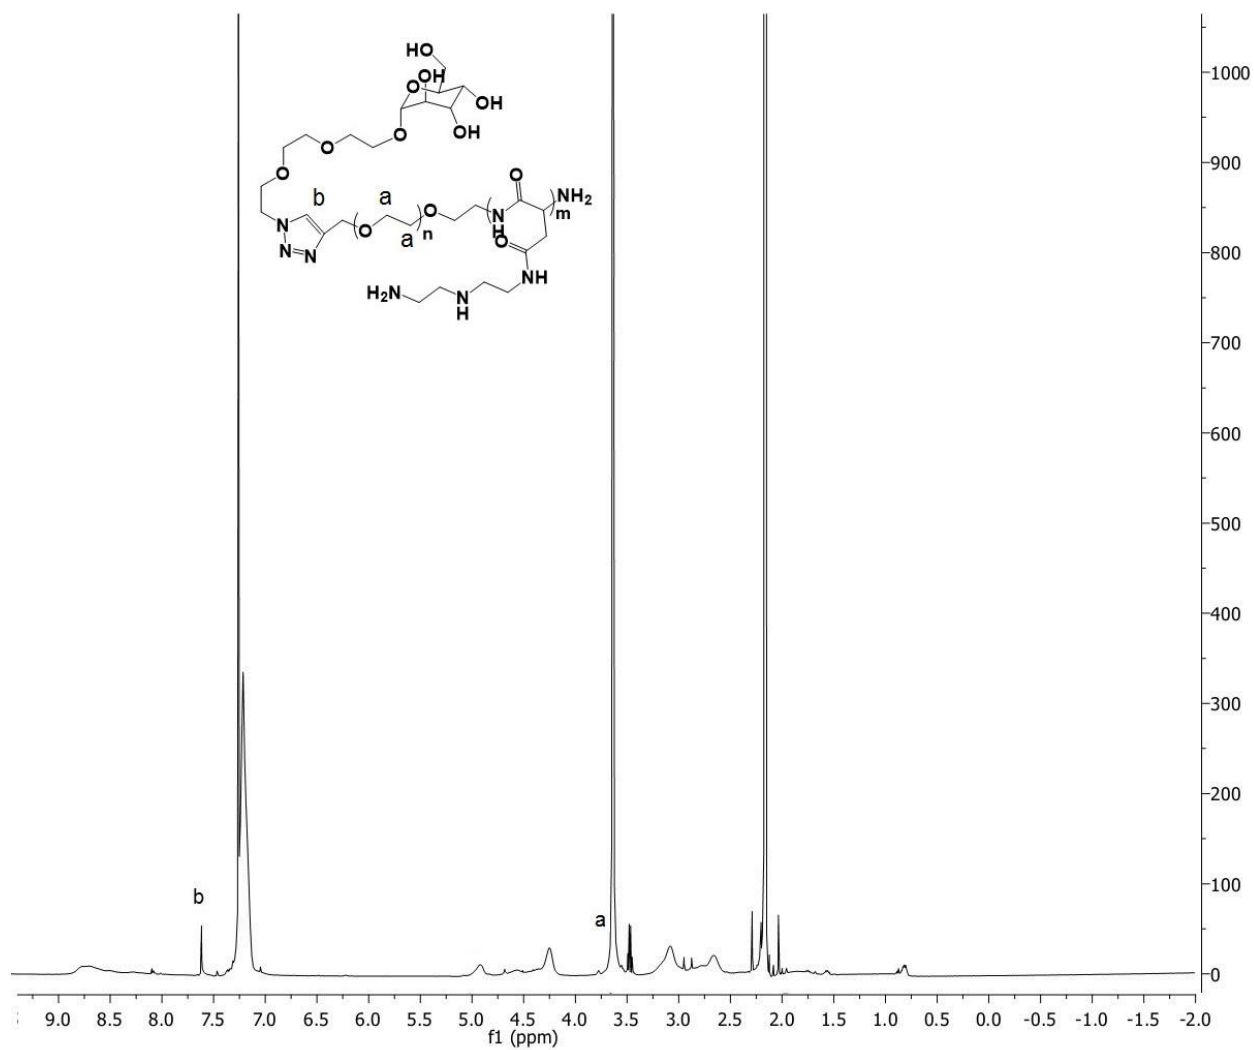

**Figure S8.**  $^1\text{H}$  NMR spectra of Man-PEG-*b*-pAsp(DET) ( $\text{CDCl}_3$ , 400 MHz, 25 °C).

**Table S1.** Characterization of polyplexes prepared using different PEG-*b*-PLL copolymers. PEG tethering density was calculated by dividing the number of PEG chains per pDNA molecule in a hypothetical stoichiometric complex by the surface area of the naked pDNA [for gWiz-GFP, 5757 bp:  $2\pi \times 1 \text{ (nm)} \times 0.338 \text{ (nm/bp)} \times 5757 \text{ (bp)} = 12,226.2 \text{ (nm}^2\text{)}$ ]. The reduced tethering density (RTD) was calculated as  $\pi R_g^2 \sigma$ . Radius of gyration ( $R_g$ , nm) of PEG was estimated according to the following equation:  $R_g = 0.181 \times (\text{DP of PEG})^{0.58} = 2.82 \text{ (nm)}$ .

| Polymer used                                      | PEG tethering density, $\sigma$ (chain/nm <sup>2</sup> ) | RTD, $\pi R_g^2 \sigma$ |
|---------------------------------------------------|----------------------------------------------------------|-------------------------|
| PEG <sub>114</sub> - <i>b</i> -PLL <sub>62</sub>  | 0.046                                                    | 1.141                   |
| PEG <sub>114</sub> - <i>b</i> -PLL <sub>150</sub> | 0.019                                                    | 0.471                   |
| PEG <sub>114</sub> - <i>b</i> -PLL <sub>206</sub> | 0.014                                                    | 0.343                   |

**Table S2.** Transfection efficiency of gWiz-Luc pDNA containing polyplexes, formed from PEG-*b*-pAsp(DET) cationic copolymers. The concentrations of pDNA were 4.53  $\mu\text{g/ml}$  for both targeted and non-targeted. Polyplexes were prepared at various N/P and were incubated with the cells for various period. Relative Luminescent Units (RLU) were normalized on protein content. Values are mean  $\pm$  SEM (n = 3).

| Polyplexes type              | RLU/mg protein |                        |                        |                          |
|------------------------------|----------------|------------------------|------------------------|--------------------------|
|                              | N/P            | 4 h incubation         | 8 incubation           | 24 incubation            |
| mPEG- <i>b</i> -pAsp(DET)    | 1              | 18763 $\pm$ 1635       | 23408 $\pm$ 3043       | 42851 $\pm$ 3686         |
| mPEG- <i>b</i> -pAsp(DET)    | 8              | 33007 $\pm$ 2648       | 24499 $\pm$ 11842      | 194067 $\pm$ 97037       |
| mPEG- <i>b</i> -pAsp(DET)    | 20             | 887248 $\pm$ 252252    | 168536 $\pm$ 64998     | 364766 $\pm$ 187237      |
| Man-PEG- <i>b</i> -pAsp(DET) | 1              | 68923 $\pm$ 8784       | 164679 $\pm$ 18158     | 389330 $\pm$ 110,921     |
| Man-PEG- <i>b</i> -pAsp(DET) | 8              | 866634 $\pm$ 84233     | 10196817 $\pm$ 1803821 | 23372325 $\pm$ 3155373   |
| Man-PEG- <i>b</i> -pAsp(DET) | 20             | 14325463 $\pm$ 1506281 | 79739546 $\pm$ 2087039 | 104834769 $\pm$ 16372866 |

**Table S3.** Extent of enhancement of transfection as a result of attachment of the mannose targeting moieties to the PEG-*b*-pAsp(DET)/pDNA polyplexes. For every N/P ratio and time point data are presented as the ratio of luciferase expression levels (RLU/mg protein) for the targeted vs. non-targeted polyplexes. Values are mean  $\pm$  SEM (n = 3).

| N/P | Times increase targeted vs. non-targeted polyplex |                   |                   |
|-----|---------------------------------------------------|-------------------|-------------------|
|     | 4 h incubation                                    | 8 incubation      | 24 incubation     |
| 1   | 3.7 $\pm$ 0.1                                     | 26.2 $\pm$ 0.3    | 16.7 $\pm$ 2.3    |
| 8   | 7.0 $\pm$ 0.1                                     | 469.8 $\pm$ 128.8 | 524.5 $\pm$ 150.3 |
| 20  | 8.9 $\pm$ 1.2                                     | 139.9 $\pm$ 45.5  | 335.0 $\pm$ 108.8 |



**Table S4.** The protein concentration (mg/ml) determined using BCA assay after treating IC-21 cells transfected using PEG-*b*-pAsp(DET)/pDNA with lysis buffer for 2 hrs. Values are mean  $\pm$  SEM (n = 3).

| Polyplex type                | N/P | Incubation time, hrs |                 |                 |
|------------------------------|-----|----------------------|-----------------|-----------------|
|                              |     | 4 h incubation       | 8 incubation    | 24 incubation   |
| mPEG- <i>b</i> -pAsp(DET)    | 1   | 2.19 $\pm$ 0.08      | 2.05 $\pm$ 0.34 | 0.80 $\pm$ 0.15 |
| mPEG- <i>b</i> -pAsp(DET)    | 8   | 2.06 $\pm$ 0.07      | 2.47 $\pm$ 0.44 | 0.81 $\pm$ 0.16 |
| mPEG- <i>b</i> -pAsp(DET)    | 20  | 1.08 $\pm$ 0.86      | 1.85 $\pm$ 0.21 | 0.86 $\pm$ 0.13 |
| Man-PEG- <i>b</i> -pAsp(DET) | 1   | 1.93 $\pm$ 0.24      | 1.89 $\pm$ 0.22 | 0.89 $\pm$ 0.09 |
| Man-PEG- <i>b</i> -pAsp(DET) | 8   | 1.79 $\pm$ 0.18      | 2.05 $\pm$ 0.31 | 0.85 $\pm$ 0.16 |
| Man-PEG- <i>b</i> -pAsp(DET) | 20  | 1.72 $\pm$ 0.24      | 1.91 $\pm$ 0.26 | 0.92 $\pm$ 0.11 |
